20. Schneider J, Woods ND, Proescholdt R, Fu Y; The RISRS Team: Recommendations from the Reducing the Inadvertent Spread of Retracted Science: Shaping a Research and Implementation Agenda Project. Available at: <https://www.ideals.illinois.edu/handle/2142/110219>. Accessed May 29, 2022.
21. Pfeil DS, Goldhammer JE: Fake news in science: Maybe they have a point? *J Cardiothorac Vasc Anesth* 2022; 36:412–3
22. International Committee of Medical Journal Editors (ICMJE): Preparing a manuscript for submission to a medical journal. Available at: <https://www.icmje.org/recommendations/browse/manuscript-preparation/preparing-for-submission.html>. Accessed April 16, 2022.
23. Rong LQ, Audisio K, Rahouma M, Soletti GJ, Cancelli G, Gaudino M: A systematic review of retractions in the field of cardiothoracic and vascular anesthesia. *J Cardiothorac Vasc Anesth* 2022; 36:403–11

## ANESTHESIOLOGY REFLECTIONS FROM THE WOOD LIBRARY-MUSEUM

# Painless Surgery Did Not Mesmerize Robert Liston until Ether Caught His Eye

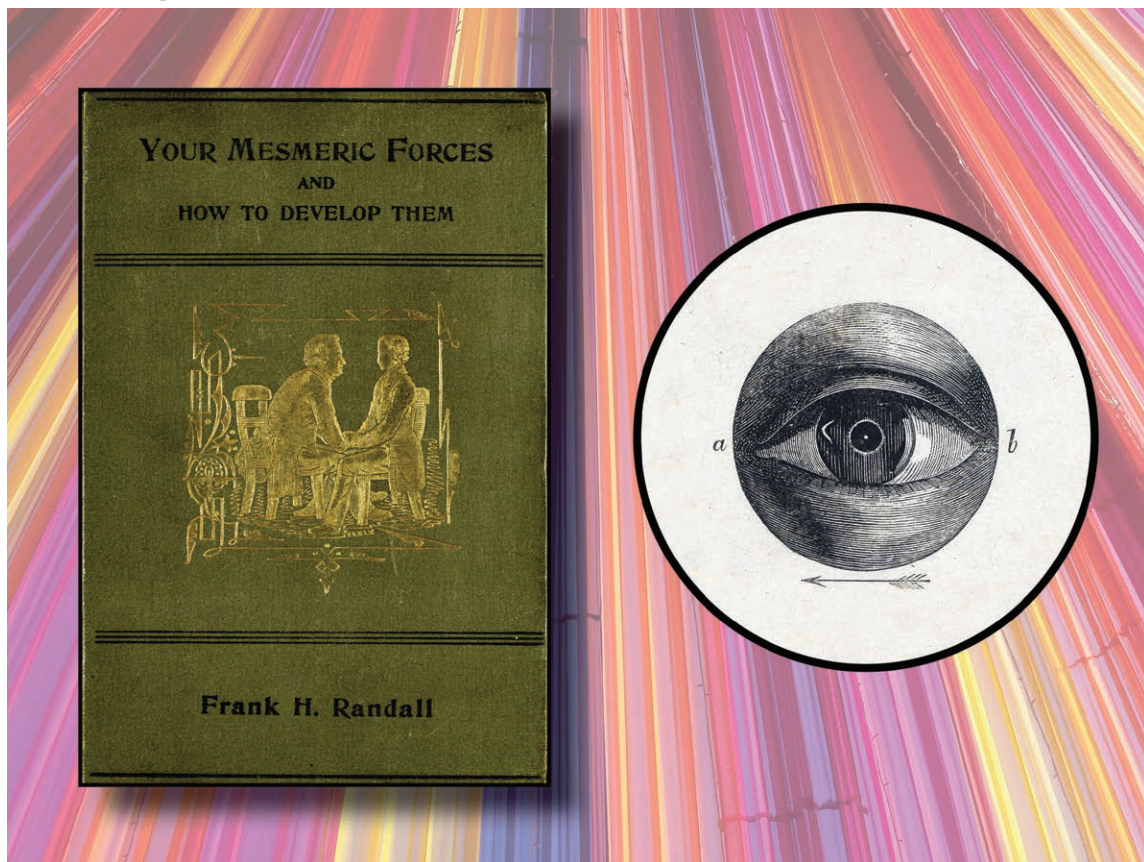

After he demonstrated ether anesthesia in December 1846, famed London surgeon Robert Liston (1794 to 1847) exclaimed, “This Yankee dodge, gentlemen, beats mesmerism hollow.” Mesmerism was popularized by German physician Franz Anton Mesmer (1734 to 1815), who posited that the magnetic force streaming through the heavens, earth, and “animated” bodies (including people) was *the* medical panacea ensuring overall health. This force could be controlled by magnets, ocular engagement, or body maneuvers wielded by trained operators. Facing broad and enduring academic opposition, mesmerism prospered somehow for over a century, thanks to popular books like *Your Mesmeric Forces and How to Develop Them* (1901, left) by Frank H. Randall. Mesmerism inspired the practice of hypnotism and influenced modern psychology’s early concepts of the subconscious. Psychology and anesthesia crossed paths for this brief time in Lister’s mid-19th-century London. Though surgical mesmerism was ultimately discredited, it sparked cultural interest in pain relief, which set the stage for accepting surgical anesthesia. (Copyright © the American Society of Anesthesiologists’ Wood Library-Museum of Anesthesiology. [www.woodlibrarymuseum.org](http://www.woodlibrarymuseum.org))

Melissa L. Coleman, M.D., Associate Professor, Department of Anesthesiology and Perioperative Medicine, Penn State College of Medicine, Hershey, Pennsylvania.
